# Supplementary material
Source: bioRxiv or medRxiv preprint supplement (http://medrxiv.org/highwire/filestream/76019/field_highwire_adjunct_files/0/2020.04.07.20056606-1.pdf)
Supplement: Supplementary file [file 2020.04.07.20056606-1.pdf]

# Supplementary Materials - Efficient network immunization under limited knowledge

Yangyang Liu,<sup>1,\*</sup> Hillel Sanhedrai,<sup>2,\*</sup> GaoGao Dong,<sup>3,†</sup> Louis M. Shekhtman,<sup>2,4,†</sup> Fan Wang,<sup>2</sup> Sergey V. Buldyrev,<sup>5</sup> and Shlomo Havlin<sup>2</sup>

<sup>1</sup>Department of Systems Science, College of Liberal Arts and Sciences, National University of Defense Technology, Changsha, Hunan 410073, China

<sup>2</sup>Department of Physics, Bar-Ilan University, Ramat Gan 5290002, Israel

<sup>3</sup>Faculty of Science, Jiangsu University, Zhenjiang, Jiangsu 212013, China

<sup>4</sup>Networks Science Institute, Northeastern University, Boston, MA 02115

<sup>5</sup>Department of Physics, Yeshiva University, New York, New York 10033, USA

(Dated: April 2, 2020)

## I. SOLUTION OF THE ODE FOR $F(k, t)$

Consider the ODE

$$-F + (N - t)\dot{F} = -F^n, \quad (\text{S1})$$

where  $F = F(k, t)$ , with the initial condition

$$F(k, t = 0) = F(k). \quad (\text{S2})$$

Using separation of variables we get

$$\frac{dF}{F - F^n} = \frac{dt}{N - t}.$$

Thus,

$$\begin{aligned} \frac{1}{n-1} \log \left| \frac{F^n}{F^n - F} \right| &= -\log(N - t) + C_1 \\ \left| \frac{F^n}{F^n - F} \right| &= e^{(n-1)(-\log(N-t) + C_1)} \\ F^{1-n} &= 1 + C_2 e^{(n-1)\log(N-t)} \\ F &= \left( 1 + C_2 e^{(n-1)\log(N-t)} \right)^{-\frac{1}{n-1}} \end{aligned}$$

Recalling that  $F(k, t = 0) = F(k)$ , and substituting  $t = 0$  gives

$$\begin{aligned} F(k)^{1-n} &= 1 + C_2 e^{(n-1)\log(N)} \\ C_2 &= (F(k)^{1-n} - 1) e^{-(n-1)\log(N)}. \end{aligned}$$

As a result,

$$F(k, t) = \left( 1 + (F(k)^{1-n} - 1) e^{(n-1)\log[(N-t)/N]} \right)^{-\frac{1}{n-1}}, \quad (\text{S3})$$

or

$$F_p(k) = \left( 1 + (F(k)^{1-n} - 1) p^{n-1} \right)^{-\frac{1}{n-1}}, \quad (\text{S4})$$

where  $F_p(k)$  is the cumulative distribution of degree of the occupied nodes after removing  $1 - p$  fraction of nodes. For  $n = 1$ , the solution of the ODE is  $F = \text{Const.}$ , namely  $F_p(k) = F(k)$  as expected. Also Eq. (S4) converges to it if we take the limit  $n \rightarrow 1$ .

## II. DERIVATION OF THE EXPONENTIAL CONVERGENCE OF $p_c$ FOR LARGE $n$

First, we find  $F_p(k)$  and  $P_p(k)$  for large  $n$ . Examining Eq. (S4) where  $n \rightarrow \infty$ , as elaborated below, we recognize two behaviors depending on  $F(k) < p$  or  $F(k) > p$ . For the leading term

$$F_p^\infty(k) = \begin{cases} \frac{F(k)}{p}, & F(k) < p \\ 1, & F(k) > p \end{cases} \quad (\text{S5})$$

See Fig. S1 for illustration.

Let us denote the next term as

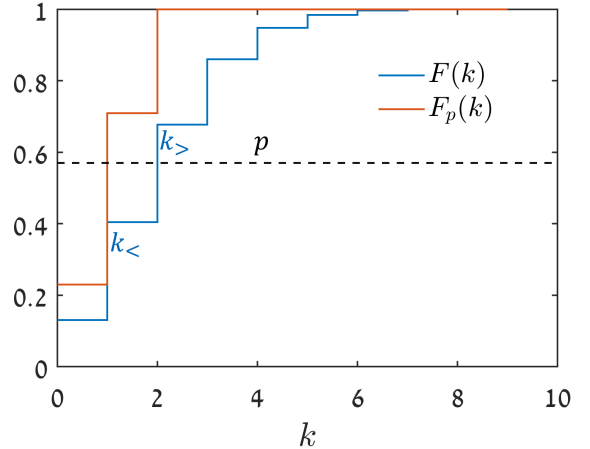

FIG. S1. **Illustration of theory for  $F_p(k)$  for large  $n$ .** For small  $k$ ,  $F(k) < p$ ,  $F_p(k) \rightarrow F(k)/p$ , and for large  $k$ ,  $F(k) > p$ ,  $F_p(k) \rightarrow 1$ . The dashed horizontal line is at the value of  $p$ .  $k_<$  and  $k_>$  are the consecutive degrees for which  $F(k_<) < p < F(k_>)$  respectively. For determining the decay rate  $\alpha$  in Eq. (S17), one should take  $p = p_c$ , and find the minimum of  $|\log(F(k)/p_c^\infty)|$  among all  $k$ , which is in fact among  $k_<$  and  $k_>$ .

$$F_p(k) = F_p^\infty(k) + \epsilon(k, p, n) \quad (\text{S6})$$

Then, we approach finding the next term,  $\epsilon$ , in each range of degree  $k$ .

\* Y. Liu and H. Sanhedrai contributed equally to this work

† To whom correspondence may be addressed. Email: dfocus.gao@gmail.com or lsheks@gmail.com

For small  $k$ , such that  $F(k) < p$ ,

$$\begin{aligned}
F_p(k) &\approx \left(1 + \left(\frac{p}{F}\right)^n - p^n\right)^{-\frac{1}{n}} \approx \left(1 + \left(\frac{p}{F}\right)^n\right)^{-\frac{1}{n}} \\
&= \frac{F}{p} \left(1 + \left(\frac{F}{p}\right)^n\right)^{-\frac{1}{n}} \\
&= \frac{F}{p} \exp\left[-\frac{1}{n} \log\left(1 + \left(\frac{F}{p}\right)^n\right)\right] \\
&\approx \frac{F}{p} \exp\left[-\frac{1}{n} \left(\frac{F}{p}\right)^n\right] \approx \frac{F(k)}{p} \left[1 - \frac{1}{n} \left(\frac{F(k)}{p}\right)^n\right] \\
&\approx \frac{F(k)}{p} - \frac{1}{n} e^{-(n+1)[\log p - \log F(k)]}
\end{aligned} \tag{S7}$$

For the particular case that there exists a degree satisfying  $F(k) = p$ ,

$$\begin{aligned}
F_p(k) &\approx \left(1 + \left(\frac{p}{F}\right)^n - p^n\right)^{-\frac{1}{n}} \\
&\approx 2^{-\frac{1}{n}} = e^{-\frac{1}{n} \log 2} \approx 1 - \frac{\log 2}{n}
\end{aligned} \tag{S8}$$

For the limit  $F(k) \rightarrow p$  such that  $(p/F(k))^n \rightarrow 1$ , let us define  $\zeta = 1 - p/F$  which is small. Then,

$$\begin{aligned}
(p/F)^n &= (1 - \zeta)^n = \exp(n \ln(1 - \zeta)) \\
&\approx 1 + n \ln(1 - \zeta) \approx 1 - \zeta n \\
&= 1 - n(1 - p/F).
\end{aligned}$$

Thus,

$$\begin{aligned}
F_p(k) &\approx \left(1 + \left(\frac{p}{F}\right)^n - p^n\right)^{-\frac{1}{n}} \\
&\approx (2 - n(1 - p/F) - p^n)^{-\frac{1}{n}} \\
&\approx \exp\left[-\frac{1}{n} \ln(2 - n(1 - p/F) - p^n)\right] \\
&\approx \exp\left[-\frac{1}{n} \ln 2 - \frac{1}{n} \ln(1 - n(1 - p/F)/2 - p^n/2)\right] \\
&\approx \exp\left[-\frac{\ln 2}{n} + \frac{1 - p/F}{2} + \frac{p^n}{2n}\right] \\
&\approx 1 - \frac{\ln 2}{n} + \frac{1 - p/F}{2} + \frac{p^n}{2n}
\end{aligned} \tag{S9}$$

For large  $k$ , namely  $p < F(k) < 1$ ,

$$\begin{aligned}
F_p(k) &\approx \left(1 + \left(\frac{p}{F}\right)^n - p^n\right)^{-\frac{1}{n}} \\
&= \exp\left[-\frac{1}{n} \log\left(1 + \left(\frac{p}{F}\right)^n - p^n\right)\right] \\
&\approx \exp\left[-\frac{1}{n} \left(\frac{p}{F}\right)^n + \frac{p^n}{n}\right] \\
&\approx 1 - \frac{1}{n} \left(\frac{p}{F(k)}\right)^n + \frac{p^n}{n} \\
&\approx 1 - \frac{1}{n} \exp(-n[\log F(k) - \log p]).
\end{aligned} \tag{S10}$$

In the limit  $F(k) \rightarrow 1$ , we should keep the last term above,  $p^n/n$ , in order to get  $F_p(k) \rightarrow 1$ . In more detail, if  $F(k)^n \rightarrow 1$  we can denote a small term  $\xi(k) = 1 - F(k)$ , which satisfies

$$\begin{aligned}
F(k)^{-n} &= \exp(-n \ln F(k)) \approx 1 - n \ln F(k) \\
&= 1 - n \ln(1 - \xi(k)) \approx 1 + n\xi(k).
\end{aligned}$$

Substituting this into Eq. (S10) gives

$$\begin{aligned}
F_p(k) &\approx 1 - \frac{1}{n} \left(\frac{p}{F(k)}\right)^n + \frac{p^n}{n} \\
&\approx 1 - \xi(k)p^n = 1 - p^n(1 - F(k)).
\end{aligned} \tag{S11}$$

Finally, for  $F(k) = 1$ , it easy to see that also  $F_p(k) = 1$ .

To summarize, the next term of  $F_p(k)$  is

$$\epsilon(k, p, n) = \begin{cases} -\frac{1}{n} e^{-\alpha_k n}, & F(k) < 1 \\ 0, & F(k) = 1 \end{cases}, \tag{S12}$$

where  $\alpha_k = |\log [p/F(k)]|$ .

If there are degrees which obey the limits  $F(k)^n \rightarrow 1$ , or  $[F(k)/p]^n \rightarrow 1$ , then they satisfy

$$\epsilon(k, p, n) = \begin{cases} -\frac{1}{n} \left(\ln 2 - n \left[1 - \frac{p}{F(k)}\right]\right), & \left(\frac{p}{F(k)}\right)^n \rightarrow 1 \\ -p^n(1 - F(k)), & F(k)^n \rightarrow 1 \end{cases}. \tag{S13}$$

Having an approximation for  $F_p(k)$ , we approach now to find  $p_c$  using the equation for criticality,

$$1 = \frac{p}{\langle k \rangle} \sum_{k=0}^{\infty} k(k-1)P_p(k). \tag{S14}$$

Before, we denote several special degrees: the degrees

where  $F(k)$  is close to  $p$ , and the maximal degree, as following

$$\begin{aligned} k_{<} &= \max_{F(k) < p} k, \\ k_{>} &= \min_{F(k) \geq p} k, \\ K &= \min_{F(k)=1} k. \end{aligned}$$

Plugging Eqs. (S5),(S12),(S6) into Eq. (S14), and using change of summation indexes, one can obtain

$$\begin{aligned} \frac{\langle k \rangle}{p_c} &= \sum_{k=2}^{\infty} k(k-1) \Delta F_p(k) \\ &= \sum_{k=2}^{\infty} k(k-1) \Delta F_p^{\infty}(k) + \sum_{k=2}^K k(k-1) \Delta \epsilon(k, p_c, n) \\ &= \sum_{k=2}^{k_{<}} k(k-1) \frac{P(k)}{p_c} + \sum_{k=k_{>}+1}^{\infty} k(k-1) \cdot 0 \\ &\quad + k_{>} k_{<} \left[ 1 - \frac{F(k_{<})}{p_c} \right] - 2 \sum_{k=1}^K k \epsilon(k, p_c, n). \end{aligned}$$

Hence,

$$\begin{aligned} \frac{\langle k \rangle}{p_c} &= \sum_{k=2}^{k_{<}} k(k-1) \frac{P(k)}{p_c} \\ &\quad + k_{>} k_{<} \left[ 1 - \frac{F(k_{<})}{p_c} \right] - 2 \sum_{k=1}^K k \epsilon(k, p_c, n) \end{aligned} \quad (\text{S15})$$

and for  $n \rightarrow \infty$ , for the leading term,  $p_c^{\infty}$ ,

$$\begin{aligned} \frac{\langle k \rangle}{p_c^{\infty}} &= \sum_{k=2}^{k_{<}} k(k-1) \frac{P(k)}{p_c^{\infty}} + k_{>} k_{<} \left[ 1 - \frac{F(k_{<})}{p_c^{\infty}} \right] \\ p_c^{\infty} &= F(k_{<}) + \frac{1}{k_{>} k_{<}} \left( \langle k \rangle - \sum_{k=2}^{k_{<}} k(k-1) P(k) \right), \end{aligned}$$

where  $k_{<}$  and  $k_{>}$  are determined by  $p_c^{\infty}$ , but are independent of  $n$ .

For the next term, returning to the equation (S15) and obtain

$$p_c = p_c^{\infty} + \frac{2p_c^{\infty}}{k_{>} k_{<}} \sum_{k=1}^K k \epsilon(k, p_c^{\infty}, n) \quad (\text{S16})$$

The terms  $\epsilon(k, p_c^{\infty}, n)$  in the summation decay exponentially with  $n$  by rate  $\alpha_k = |\ln[p_c^{\infty}/F(k)]|$ , and because  $n \rightarrow \infty$ , the dominant term is the one with the lowest rate  $\alpha = \min_k \{\alpha_k\}$ , and the corresponding  $k$  will be denoted by  $k_{\text{slow}}$ , meaning  $\alpha = \alpha_{k_{\text{slow}}}$ .

Therefore,

$$p_c \sim p_c^{\infty} - A \frac{1}{n} e^{-\alpha n} \quad (\text{S17})$$

where  $\alpha = \min_k |\ln[p_c^{\infty}/F(k)]|$  and  $A = (2p_c^{\infty} k_{\text{slow}})/(k_{>} k_{<})$ . It is obvious that  $k_{\text{slow}}$  is  $k_{<}$  or  $k_{>}$  because  $F(k)$  is monotonic.

We know that if  $F(k) = 1$  then  $\epsilon = 0$ , so if  $F(k_{\text{slow}}) = F(k_{>}) = 1$  then  $k_{<}$  should be taken as  $k_{\text{slow}}$ . It should also be noted that if  $F(k_{\text{slow}}) = p_c^{\infty}$  or very close, then  $\epsilon(k_{\text{slow}}, p_c^{\infty}, n) = -n^{-1} \log 2$ . Another special case is where  $k_{\text{slow}}$  is not unique, then we take all of them, and  $k_{\text{slow}}$  is replaced by  $\sum_{k_{\text{slow}}} k_{\text{slow}}$ .

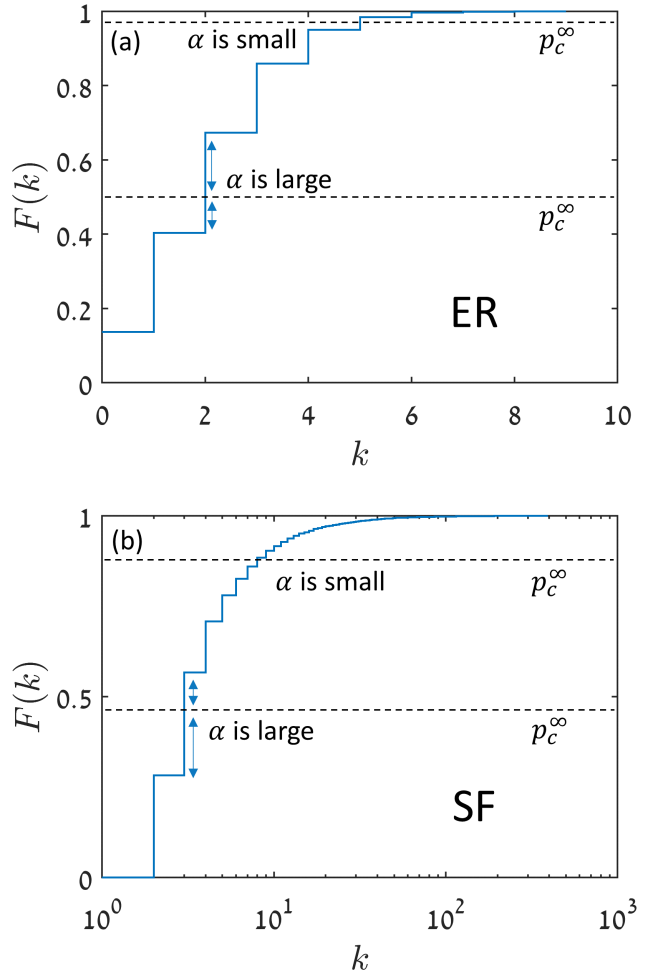

FIG. S2. **Examples of  $F(k)$ .** The decay rate  $\alpha$  determines the regimes of power law or exponential convergence of  $p_c(n \rightarrow \infty)$ .  $\alpha$  depends on the minimal ratio between  $p_c^{\infty}$  and  $F(k)$ . Hence  $\alpha$  is influenced by the density of  $F(k)$  in the neighborhood of  $p_c^{\infty}$ . Here we show the patterns of  $F(k)$  for ER network with  $N = 10^4$  and  $k = 2$  (a), and for SF network with  $N = 10^4$  and  $\gamma = 2.5$  (b). One can see that for larger  $p_c^{\infty}$ ,  $F(k)$  is much more dense for SF network, which makes  $\alpha$  become small and extend the power-law regime.

The behavior of Eq. (S17) depends on the value of  $n$ , and splits into two regimes. Where  $n \ll 1/\alpha$ , convergence will be according to a power-law, and where  $n \gg 1/\alpha$  the convergence is exponential. It means that the width of these two regimes depends on  $\alpha$ . The value

of  $\alpha$  depends on the value of  $p_c^\infty$  and the details of the degree distribution. Therefore, taking conditions providing  $p_c^\infty \rightarrow 1$  might lead to a broader power law regime. That is because the tail of the degree distribution,  $P(k)$ , has very small values, which can be  $\sim 1/N$ . That implies that there are values of  $F(k) \sim 1 - 1/N$ , which yields  $\alpha = \min_k |\log(p_c^\infty/F(k))| \approx \log(1) - \log(1 - 1/N) \approx 1/N$ , and makes the power law regime being any  $n \ll N$  in this case. In contrast, if  $p_c^\infty$  is not very close to 1, then  $\alpha$  is expected to be finite because  $F(k)$  is not very dense in this regime. Therefore, the exponential behavior will rule even for small  $n$ . See in Fig. S2 examples of ER and SF networks.

### III. DERIVATION OF $p_c$ VS $n$ FOR SCALE-FREE NETWORKS WITH SMALL $n$

Here we consider SF network with  $2 < \gamma < 3$ . If  $n = 1$ , then  $p_c \rightarrow 0$ . In order to find out for which  $n$ ,  $p_c$  becomes non-zero, we analyze Eqs. (S4) and (S14) for large  $k$  (high degrees govern the behavior in SF network), small  $n$  and  $p$  as follows.

It can be shown that

$$F(k) \approx 1 - (k/m)^{1-\gamma}, \quad (\text{S18})$$

Then,

$$\begin{aligned} F(k)^n &\approx \left(1 - (k/m)^{1-\gamma}\right)^n \approx \exp\left[n \log\left(1 - (k/m)^{1-\gamma}\right)\right] \\ &\approx \exp\left[-n (k/m)^{1-\gamma}\right] \approx 1 - n (k/m)^{1-\gamma}, \\ F(k)^{1-n} &\approx 1 + (n-1) (k/m)^{1-\gamma}, \end{aligned}$$

where we assume  $(k/m)^{\gamma-1} \gg n$  for large degrees. Plugging this into Eq. (S4),

$$\begin{aligned} F_p(k) &= \left(1 + (F(k)^{1-n} - 1) p^{n-1}\right)^{-\frac{1}{n-1}} \\ &\approx \left(1 + (n-1) (k/m)^{1-\gamma} p^{n-1}\right)^{-\frac{1}{n-1}} \\ &\approx \exp\left[-\frac{1}{n-1} \log\left(1 + (n-1) (k/m)^{1-\gamma} p^{n-1}\right)\right] \\ &\approx \exp\left[-\frac{1}{n-1} (n-1) (k/m)^{1-\gamma} p^{n-1}\right] \\ &\approx 1 - p^{n-1} (k/m)^{1-\gamma}. \end{aligned}$$

That leads to

$$P_p(k) \approx \frac{\partial F_p(k)}{\partial k} \approx \frac{\gamma-1}{m} p^{n-1} \left(\frac{k}{m}\right)^{-\gamma} = p^{n-1} P(k). \quad (\text{S19})$$

Now we should notice that  $P_p(k)$  has a new natural cut-off,  $K_p$ , which depends on  $p$  as following

$$\begin{aligned} \int_{K_p}^{\infty} p^{n-1} A k^{-\gamma} &= \frac{1}{Np}, \\ K_p &\sim p^{n/(\gamma-1)} N^{1/(\gamma-1)}. \end{aligned} \quad (\text{S20})$$

Taking the result of Eq. (S19) into Eq. (S14) and keeping the leading terms, where  $\langle k_{p_c} \rangle$  (average degree of the remaining nodes) is finite and  $\langle k_{p_c}^2 \rangle$  increases with  $N$ , we obtain

$$1 = \frac{p_c}{\langle k \rangle} \sum_{k=0}^{\infty} k(k-1) P_{p_c}(k) \sim \frac{p_c}{\langle k \rangle} \langle k_{p_c}^2 \rangle.$$

But

$$\langle k_{p_c}^2 \rangle \sim \int_m^{K_{p_c}} k^2 p_c^{n-1} A k^{-\gamma} \sim p_c^{n-1} K_{p_c}^{3-\gamma} \sim p_c^{n-1+n\beta} N^\beta, \quad (\text{S21})$$

where  $\beta = (3-\gamma)/(\gamma-1)$ .

Substituting  $\langle k_{p_c}^2 \rangle$  into the Eq. above provides

$$1 \sim \frac{p_c}{\langle k \rangle} \langle k_{p_c}^2 \rangle \sim \frac{p_c^{n+n\beta}}{\langle k \rangle} N^\beta.$$

Therefore

$$p_c \sim N^{-\delta/n} \sim \exp[-\delta \log(N)/n], \quad (\text{S22})$$

where

$$\delta = \frac{\beta}{1+\beta} = \frac{3-\gamma}{2}. \quad (\text{S23})$$

This scaling is with  $N$ . The pre-factor depends on  $n$  but not in  $N$ . The scaling is valid for large  $N$ .

From Eq. (S22), it is easy to see that if  $n \ll \log N$ ,  $p_c \rightarrow 0$ , while if  $n \sim \log N$ ,  $p_c$  becomes non-zero.

After we completed the calculation, for consistency, we should return to check our initial assumption saying  $(k/m)^{\gamma-1} \gg n$  for the large degrees. We should apply this condition on  $K_{p_c}$  that we found.  $n \ll (K_{p_c}/m)^{\gamma-1} \sim p_c^n N/m^{\gamma-1}$ , and substituting  $p_c$  that we found, we get  $n \ll N^{1-\delta} = N^{(\gamma-1)/2}$ . To conclude, we can say that Eq. (S22) is valid for

$$n \ll N^{(\gamma-1)/2}. \quad (\text{S24})$$

### IV. EXAMPLE OF A SIMPLE NETWORK WITH ONLY TWO DEGREES

Here we consider an example of a simple degree distribution which can be analyzed simply as following

$$P(k) = \begin{cases} r, & k = 1 \\ 1-r, & k = 3 \\ 0, & \text{else} \end{cases} \quad (\text{S25})$$

Then  $F(1) = r$ ,  $F(2) = r$ ,  $F(3) = 1$ .

Assuming that  $r < p_c < 1$ , one can observe that this assumption is consistent with the final result. Hence,

from Eq. (S7)

$$F_p(k) = \begin{cases} 0, & k = 0 \\ \frac{r}{p_c} - \frac{1}{n} \left( \frac{r}{p_c} \right)^{n+1}, & k = 1 \\ \frac{r}{p_c} - \frac{1}{n} \left( \frac{r}{p_c} \right)^{n+1}, & k = 2 \\ 1, & k = 3 \end{cases} \quad (\text{S26})$$

Thus

$$\begin{aligned} \frac{\langle k \rangle}{p_c} &= \sum_{k=2}^3 k(k-1) \Delta F_p(k) = 2 \cdot 1 \cdot 0 \\ &\quad + 3 \cdot 2 \cdot \left[ 1 - \frac{r}{p_c} + \frac{1}{n} \left( \frac{r}{p_c} \right)^{n+1} \right], \\ \frac{3-2r}{p_c} &= 6 \left[ 1 - \frac{r}{p_c} + \frac{1}{n} \left( \frac{r}{p_c} \right)^{n+1} \right], \\ p_c &= \frac{3+4r}{6} - \frac{r}{n} \left( \frac{r}{p_c} \right)^n. \end{aligned}$$

For the limit of  $n \rightarrow \infty$

$$p_c^\infty = \frac{1}{2} + \frac{2r}{3}. \quad (\text{S27})$$

Note that  $r < 3/4$ , otherwise, there is no giant component even without attack.

Then, we conclude for large  $n$  that  $p_c = p_c^\infty + o(1)$ . As a result, for the leading term

$$p_c = p_c^\infty - \frac{r}{n} \left( \frac{r}{p_c^\infty} \right)^n = p_c^\infty - \frac{r}{n} \exp(-\alpha n), \quad (\text{S28})$$

where  $\alpha = \log(2/3 + 1/(2r))$ .

The other limit of  $n = 1$  is the random attack, and  $p_c$  is obtained by the simple known formula for configuration model  $p_c = 1/(\kappa - 1)$ . It is easy to find that  $\langle k \rangle = 3 - 2r$  and  $\langle k^2 \rangle = 9 - 8r$ , resulting

$$p_c(n=1) = \frac{1}{2} + \frac{1}{6} \frac{r}{1-r}. \quad (\text{S29})$$

Now we analyze a similar but a little bit different case where

$$P(k) = \begin{cases} r, & k = 2 \\ 1-r, & k = 3 \\ 0, & \text{else} \end{cases} \quad (\text{S30})$$

Here  $F(1) = 0$ ,  $F(2) = r$ ,  $F(3) = 1$ . Thus,

$$F_p(k) = \begin{cases} 0, & k = 1 \\ \frac{r}{p_c} - \frac{1}{n} \left( \frac{r}{p_c} \right)^{n+1}, & k = 2 \\ 1, & k = 3 \end{cases} \quad (\text{S31})$$

Therefore,

$$\begin{aligned} \frac{\langle k \rangle}{p_c} &= \sum_{k=2}^3 k(k-1) \Delta F_p(k) = 2 \cdot 1 \cdot \left[ \frac{r}{p_c} - \frac{1}{n} \left( \frac{r}{p_c} \right)^{n+1} \right] \\ &\quad + 3 \cdot 2 \cdot \left[ 1 - \frac{r}{p_c} + \frac{1}{n} \left( \frac{r}{p_c} \right)^{n+1} \right], \\ \frac{3-r}{p_c} &= 6 - 4 \left[ \frac{r}{p_c} - \frac{1}{n} \left( \frac{r}{p_c} \right)^{n+1} \right], \\ p_c &= \frac{1+r}{2} - \frac{2r}{3n} \left( \frac{r}{p_c} \right)^n. \end{aligned}$$

For the limit of  $n \rightarrow \infty$

$$p_c^\infty = \frac{1}{2} + \frac{r}{2}. \quad (\text{S32})$$

Therefore, for the next leading term

$$p_c = \frac{1+r}{2} - \frac{2r}{3n} \left( \frac{2r}{1+r} \right)^n. \quad (\text{S33})$$

Now, if we will take  $r \sim 1 - b/N$ , where  $b$  is finite, then

$$p_c \approx 1 - \frac{2}{3n} \left( 1 - \frac{b}{N} \right)^n \approx 1 - \frac{2}{3n} e^{-b \frac{n}{N}}. \quad (\text{S34})$$

Hence, if  $n \ll N$  then

$$1 - p_c \sim \frac{1}{n}. \quad (\text{S35})$$

This happens because  $p_c \rightarrow 1$  where  $r \rightarrow 1$ , but  $F(2) = r$ , hence  $F(2) \rightarrow p_c$ , which yields a power law behavior of  $p_c(n)$ .
